# Supplementary material
Source: Elsevier journal article supplement (https://www.sciencedirect.com/science/article/pii/S2255553618301046)
Supplement: mmc1 [file S2255553618301046:mmc1.docx]

**Tabela Complementar 1**. Comparação da HOMA-RI entre os indivíduos posicionados em cada intervalo quartil para RCE, índice TyG e TG/HDL-C

|  | Meninas | | | |  | Meninos | | | |
| --- | --- | --- | --- | --- | --- | --- | --- | --- | --- |
|  | 1º | 2º | 3º | 4º |  | 1º | 2º | 3º | 4º |
| **RCE** | 2,10 ± 1,13 | 2,08 ± 1,21 | 2,76 ± 1,53 | 4,31 ± 2,44b |  | 1,79± 0,89 | 2,09± 0,99 | 1,97± 1,17 | 3,69± 2,69b |
| **Índice TyG** | 1,99± 1,16 | 2,47± 1,53 | 2,95± 1,78 | 3,85± 2,40a |  | 1,45± 0,76 | 2,04± 0,91 | 2,41± 1,22 | 3,95± 2,65b |
| **TG/HDL-C** | 2,13± 1,17 | 2,28± 1,36 | 2,80± 1,66 | 3,97± 2,42b |  | 1,67± 0,92 | 1,85± 0,76 | 2,44± 1,30 | 4,21± 2,86b |

HOMA-RI, modelo de avaliação da homeostase de resistência à insulina; RCE, razão cintura/estatura; índice TyG, índice triglicerídeos/glicose; TG/HDL-C, razão triglicerídeos/HDL-C.

a Significativamente diferente dos quartis 1 e 2.

b Significativamente diferente dos quartis 1, 2 e 3.
